# Supplementary material
Source: PubMed Central journal article supplement (PMC3945648)
Supplement: NIHMS520227-supplement-01.pdf [file NIHMS520227-supplement-01.pdf]

**Supplementary Figure 1.** Dot plot presenting the significant correlation between the immunohistochemical score and the percentage of cells with three or more copies of the *PHIP* locus in primary melanoma ( $P < 0.0001$ , linear regression analysis).

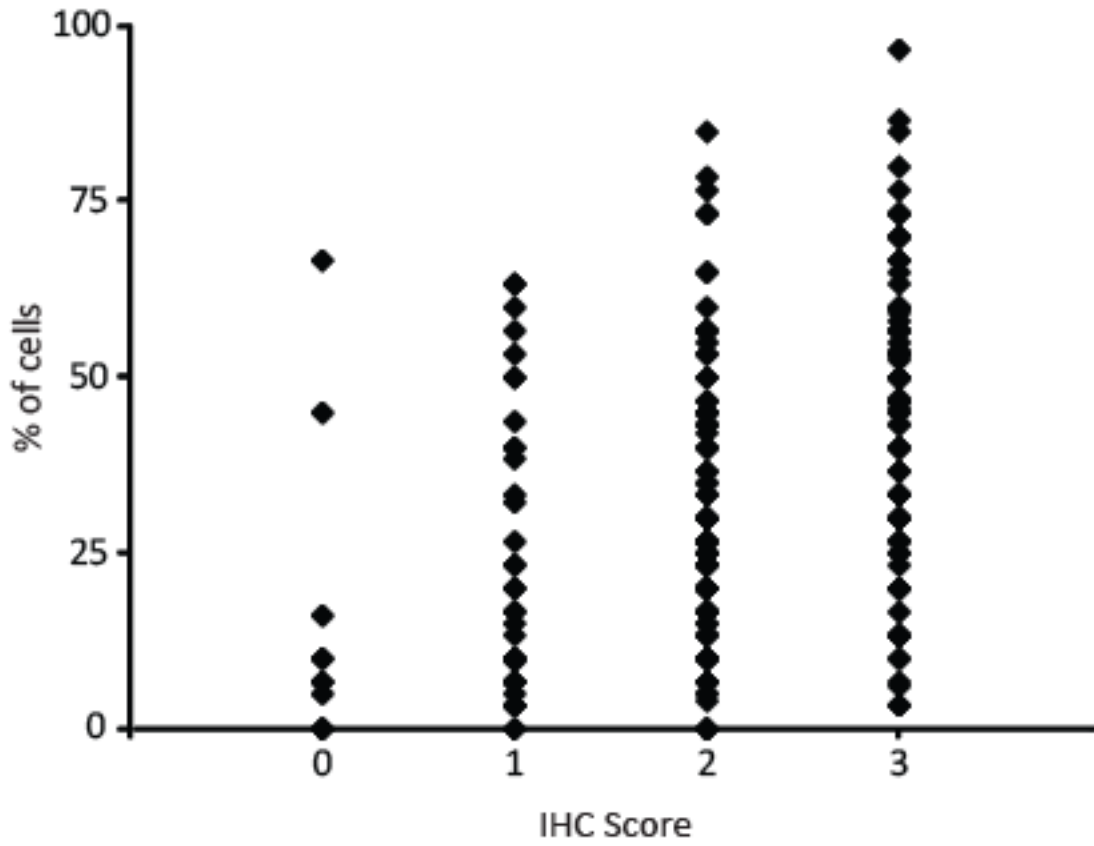

**Supplementary Table 1.** FISH results as counts of signals from BAC clones mapping the PHIP locus and the flanking centromeric region of chromosome 6

| Case | IHC PHIP score | Mean copy number of PHIP |       | Mean copy number of Chr 6 |       |     | Ratio | % of cells with three or more copies of PHIP | % of cells with three or more copies of Chr 6 |
|------|----------------|--------------------------|-------|---------------------------|-------|-----|-------|----------------------------------------------|-----------------------------------------------|
| 1    | 0              | 2.0                      | ± 0.0 | 2.0                       | ± 0.0 | 1.0 | 0.0   | 0.0                                          |                                               |
| 2    | 0              | 2.3                      | ± 0.7 | 2.3                       | ± 0.7 | 1.0 | 16.1  | 12.9                                         |                                               |
| 3    | 0              | 2.1                      | ± 0.7 | 2.1                       | ± 0.6 | 1.0 | 10.0  | 6.7                                          |                                               |
| 4    | 0              | 1.9                      | ± 0.3 | 1.9                       | ± 0.3 | 1.0 | 0.0   | 0.0                                          |                                               |
| 5    | 0              | 1.8                      | ± 0.4 | 1.9                       | ± 0.3 | 1.0 | 0.0   | 0.0                                          |                                               |
| 6    | 0              | 2.8                      | ± 1.2 | ND                        |       | ND  | 45.0  | ND                                           |                                               |
| 7    | 0              | 2.2                      | ± 0.7 | 2.0                       | ± 0.6 | 1.1 | 10.0  | 10.0                                         |                                               |
| 8    | 0              | 2.0                      | ± 0.4 | 1.8                       | ± 0.6 | 1.1 | 5.0   | 5.0                                          |                                               |
| 9    | 0              | 3.4                      | ± 1.5 | 3.3                       | ± 1.3 | 1.1 | 66.7  | 63.3                                         |                                               |
| 10   | 0              | 2.0                      | ± 0.6 | 1.9                       | ± 0.6 | 1.0 | 6.7   | 6.7                                          |                                               |
| 11   | 0              | 2.0                      | ± 0.6 | 2.0                       | ± 0.6 | 1.0 | 6.7   | 6.7                                          |                                               |
| 12   | 1              | 1.9                      | ± 0.3 | 1.9                       | ± 0.3 | 1.0 | 0.0   | 0.0                                          |                                               |
| 13   | 1              | 2.8                      | ± 1.5 | 2.8                       | ± 1.4 | 1.0 | 40.0  | 36.7                                         |                                               |
| 14   | 1              | 4.1                      | ± 2.1 | 3.6                       | ± 1.6 | 1.1 | 63.3  | 73.3                                         |                                               |
| 15   | 1              | 2.8                      | ± 0.9 | 2.6                       | ± 0.9 | 1.1 | 50.0  | 35.0                                         |                                               |
| 16   | 1              | 2.2                      | ± 0.8 | 2.0                       | ± 0.6 | 1.1 | 20.0  | 10.0                                         |                                               |
| 17   | 1              | 3.1                      | ± 1.0 | 2.8                       | ± 0.9 | 1.1 | 63.3  | 60.0                                         |                                               |
| 18   | 1              | 2.4                      | ± 1.1 | 2.5                       | ± 1.1 | 1.0 | 38.5  | 38.5                                         |                                               |
| 19   | 1              | 2.9                      | ± 1.0 | 2.8                       | ± 0.9 | 1.0 | 56.7  | 60.0                                         |                                               |
| 20   | 1              | 2.9                      | ± 1.0 | 3.0                       | ± 0.9 | 1.0 | 53.3  | 63.3                                         |                                               |
| 21   | 1              | 2.7                      | ± 1.0 | 2.5                       | ± 1.0 | 1.1 | 32.3  | 32.3                                         |                                               |
| 22   | 1              | 2.1                      | ± 0.6 | 2.2                       | ± 0.5 | 1.0 | 15.0  | 10.0                                         |                                               |
| 23   | 1              | 2.8                      | ± 0.9 | 2.5                       | ± 0.8 | 1.1 | 50.0  | 46.7                                         |                                               |
| 24   | 1              | 2.0                      | ± 0.6 | 1.9                       | ± 0.4 | 1.0 | 9.7   | 3.2                                          |                                               |
| 25   | 1              | 2.1                      | ± 0.7 | 2.0                       | ± 0.7 | 1.0 | 16.7  | 10.0                                         |                                               |
| 26   | 1              | 2.8                      | ± 1.2 | 3.2                       | ± 1.7 | 0.9 | 43.8  | 46.9                                         |                                               |
| 27   | 1              | 1.8                      | ± 0.5 | 1.9                       | ± 0.3 | 1.0 | 3.3   | 0.0                                          |                                               |
| 28   | 1              | 2.0                      | ± 0.5 | 2.0                       | ± 0.6 | 1.0 | 10.0  | 10.0                                         |                                               |
| 29   | 1              | 2.1                      | ± 0.6 | 2.0                       | ± 0.7 | 1.0 | 10.0  | 10.0                                         |                                               |
| 30   | 1              | 1.9                      | ± 0.4 | 1.9                       | ± 0.4 | 1.0 | 3.3   | 3.3                                          |                                               |
| 31   | 1              | 2.6                      | ± 3.7 | 1.9                       | ± 0.3 | 1.4 | 3.3   | 0.0                                          |                                               |
| 32   | 1              | 2.0                      | ± 0.6 | 2.1                       | ± 0.5 | 0.9 | 10.0  | 13.3                                         |                                               |
| 33   | 1              | 3.3                      | ± 1.5 | 3.2                       | ± 1.3 | 1.0 | 60.0  | 60.0                                         |                                               |
| 34   | 1              | 2.3                      | ± 1.0 | 2.2                       | ± 0.9 | 1.1 | 23.3  | 16.7                                         |                                               |
| 35   | 1              | 2.0                      | ± 0.7 | 2.0                       | ± 0.5 | 1.0 | 10.0  | 6.7                                          |                                               |
| 36   | 1              | 2.0                      | ± 0.7 | 2.1                       | ± 0.6 | 1.0 | 13.3  | 10.0                                         |                                               |
| 37   | 1              | 2.0                      | ± 0.5 | 2.0                       | ± 0.6 | 1.0 | 6.7   | 6.7                                          |                                               |
| 38   | 1              | 2.0                      | ± 0.6 | 1.9                       | ± 0.5 | 1.0 | 6.7   | 3.3                                          |                                               |
| 39   | 1              | 2.3                      | ± 0.8 | 2.2                       | ± 0.8 | 1.0 | 33.3  | 26.7                                         |                                               |
| 40   | 1              | 2.1                      | ± 0.7 | 2.0                       | ± 0.6 | 1.1 | 10.0  | 10.0                                         |                                               |
| 41   | 1              | 2.2                      | ± 0.7 | 2.4                       | ± 0.9 | 0.9 | 23.3  | 26.7                                         |                                               |
| 42   | 1              | 2.3                      | ± 1.3 | 2.4                       | ± 1.3 | 1.0 | 16.7  | 23.3                                         |                                               |
| 43   | 1              | 1.9                      | ± 0.5 | 2.0                       | ± 0.5 | 0.9 | 5.0   | 10.0                                         |                                               |
| 44   | 1              | 1.8                      | ± 0.4 | 1.9                       | ± 0.3 | 0.9 | 0.0   | 0.0                                          |                                               |

|    |   |     |   |     |     |   |     |     |      |      |
|----|---|-----|---|-----|-----|---|-----|-----|------|------|
| 45 | 1 | 1.9 | ± | 0.4 | 1.9 | ± | 0.6 | 1.0 | 6.7  | 6.7  |
| 46 | 1 | 1.5 | ± | 0.6 | 3.7 | ± | 1.4 | 0.4 | 6.7  | 80.0 |
| 47 | 1 | 2.0 | ± | 0.6 | 1.9 | ± | 0.5 | 1.1 | 10.0 | 6.7  |
| 48 | 1 | 2.2 | ± | 0.6 | 2.2 | ± | 0.6 | 1.0 | 26.7 | 26.7 |
| 49 | 1 | 1.9 | ± | 0.4 | 1.9 | ± | 0.3 | 1.0 | 3.3  | 0.0  |
| 50 | 1 | 2.8 | ± | 1.2 | 2.8 | ± | 1.2 | 1.0 | 40.0 | 35.0 |
| 51 | 1 | 2.2 | ± | 0.8 | 2.0 | ± | 0.7 | 1.1 | 20.0 | 10.0 |
| 52 | 2 | 1.7 | ± | 0.4 | 1.8 | ± | 0.4 | 1.0 | 0.0  | 0.0  |
| 53 | 2 | 2.0 | ± | 0.3 | 1.9 | ± | 0.3 | 1.1 | 4.0  | 0.0  |
| 54 | 2 | 3.4 | ± | 1.5 | 3.3 | ± | 1.3 | 1.0 | 73.3 | 73.3 |
| 55 | 2 | 1.8 | ± | 0.4 | 1.9 | ± | 0.4 | 0.9 | 0.0  | 0.0  |
| 56 | 2 | 2.5 | ± | 1.0 | 1.9 | ± | 0.9 | 1.3 | 40.0 | 10.0 |
| 57 | 2 | 2.2 | ± | 0.7 | 1.7 | ± | 0.6 | 1.3 | 25.0 | 5.0  |
| 58 | 2 | 2.7 | ± | 1.0 | 2.7 | ± | 1.0 | 1.0 | 36.7 | 36.7 |
| 59 | 2 | 3.1 | ± | 0.7 | 2.6 | ± | 0.8 | 1.2 | 78.6 | 42.9 |
| 60 | 2 | 2.4 | ± | 0.9 | 2.1 | ± | 0.9 | 1.1 | 26.7 | 23.3 |
| 61 | 2 | 2.9 | ± | 1.3 | 2.7 | ± | 1.1 | 1.1 | 45.0 | 45.0 |
| 62 | 2 | 3.2 | ± | 1.2 | 3.6 | ± | 1.5 | 0.9 | 56.7 | 73.3 |
| 63 | 2 | 2.8 | ± | 0.9 | 2.8 | ± | 1.0 | 1.0 | 56.7 | 46.7 |
| 64 | 2 | 1.9 | ± | 0.4 | 1.9 | ± | 0.4 | 1.0 | 5.0  | 0.0  |
| 65 | 2 | 2.3 | ± | 0.9 | 2.3 | ± | 0.8 | 1.0 | 25.0 | 20.0 |
| 66 | 2 | 2.1 | ± | 0.6 | 2.1 | ± | 0.6 | 1.0 | 15.0 | 15.0 |
| 67 | 2 | 2.9 | ± | 1.2 | 2.9 | ± | 1.3 | 1.0 | 50.0 | 46.7 |
| 68 | 2 | 2.5 | ± | 0.9 | 2.2 | ± | 0.7 | 1.1 | 25.0 | 20.0 |
| 69 | 2 | 2.5 | ± | 1.0 | 2.7 | ± | 1.3 | 0.9 | 30.0 | 40.0 |
| 70 | 2 | 2.6 | ± | 1.5 | 2.4 | ± | 1.3 | 1.1 | 33.3 | 26.7 |
| 71 | 2 | 2.2 | ± | 0.9 | 2.3 | ± | 0.8 | 1.0 | 20.0 | 23.3 |
| 72 | 2 | 1.9 | ± | 0.3 | 1.8 | ± | 0.4 | 1.0 | 0.0  | 0.0  |
| 73 | 2 | 1.9 | ± | 0.5 | 1.9 | ± | 0.6 | 1.0 | 10.0 | 6.7  |
| 74 | 2 | 2.4 | ± | 0.9 | 2.6 | ± | 1.0 | 0.9 | 30.0 | 30.0 |
| 75 | 2 | 2.4 | ± | 1.0 | 2.3 | ± | 0.6 | 1.0 | 20.0 | 16.7 |
| 76 | 2 | 2.3 | ± | 0.8 | 2.5 | ± | 1.1 | 0.9 | 30.0 | 30.0 |
| 77 | 2 | 2.0 | ± | 0.7 | 2.1 | ± | 0.7 | 1.0 | 13.3 | 16.7 |
| 78 | 2 | 3.3 | ± | 2.1 | 3.1 | ± | 2.0 | 1.1 | 43.3 | 43.3 |
| 79 | 2 | 2.0 | ± | 0.7 | 2.2 | ± | 0.7 | 0.9 | 16.7 | 13.3 |
| 80 | 2 | 2.4 | ± | 0.9 | 2.3 | ± | 0.8 | 1.0 | 30.0 | 30.0 |
| 81 | 2 | 2.4 | ± | 0.9 | 2.4 | ± | 1.0 | 1.0 | 23.3 | 23.3 |
| 82 | 2 | 2.0 | ± | 0.6 | 1.9 | ± | 0.6 | 1.1 | 10.0 | 5.0  |
| 83 | 2 | 3.0 | ± | 1.0 | 3.0 | ± | 1.2 | 1.0 | 60.0 | 56.7 |
| 84 | 2 | 2.8 | ± | 1.0 | 2.7 | ± | 1.0 | 1.1 | 45.0 | 40.0 |
| 85 | 2 | 2.7 | ± | 0.8 | 2.8 | ± | 0.9 | 1.0 | 56.7 | 50.0 |
| 86 | 2 | 2.3 | ± | 0.8 | 2.4 | ± | 1.1 | 1.0 | 26.7 | 33.3 |
| 87 | 2 | 2.1 | ± | 0.7 | 2.2 | ± | 0.7 | 1.0 | 10.0 | 15.0 |
| 88 | 2 | 2.2 | ± | 0.9 | 2.1 | ± | 0.9 | 1.0 | 13.3 | 13.3 |
| 89 | 2 | 2.3 | ± | 0.9 | 2.2 | ± | 0.7 | 1.0 | 20.0 | 25.0 |
| 90 | 2 | 2.7 | ± | 0.9 | 2.5 | ± | 1.0 | 1.1 | 35.0 | 30.0 |
| 91 | 2 | 2.3 | ± | 0.9 | 2.6 | ± | 0.9 | 0.9 | 30.0 | 35.0 |
| 92 | 2 | 2.2 | ± | 0.8 | 2.1 | ± | 0.8 | 1.0 | 20.0 | 15.0 |
| 93 | 2 | 2.2 | ± | 0.8 | 2.4 | ± | 0.9 | 0.9 | 20.0 | 25.0 |
| 94 | 2 | 2.8 | ± | 1.0 | 2.8 | ± | 1.0 | 1.0 | 45.0 | 40.0 |

|     |   |     |   |     |     |   |     |     |      |      |
|-----|---|-----|---|-----|-----|---|-----|-----|------|------|
| 95  | 2 | 2.1 | ± | 0.7 | 2.2 | ± | 0.7 | 1.0 | 13.3 | 16.7 |
| 96  | 2 | 2.2 | ± | 1.0 | 2.3 | ± | 1.0 | 1.0 | 20.0 | 20.0 |
| 97  | 2 | 2.3 | ± | 0.7 | 2.3 | ± | 0.7 | 1.0 | 20.0 | 20.0 |
| 98  | 2 | 2.0 | ± | 0.5 | 1.9 | ± | 0.4 | 1.0 | 6.7  | 3.3  |
| 99  | 2 | 2.2 | ± | 0.9 | 2.4 | ± | 0.9 | 0.9 | 16.7 | 20.0 |
| 100 | 2 | 1.8 | ± | 0.4 | 1.8 | ± | 0.4 | 1.0 | 0.0  | 0.0  |
| 101 | 2 | 2.0 | ± | 0.7 | 1.9 | ± | 0.7 | 1.1 | 10.0 | 6.7  |
| 102 | 2 | 2.6 | ± | 1.1 | 2.6 | ± | 1.1 | 1.0 | 40.0 | 40.0 |
| 103 | 2 | 3.2 | ± | 2.3 | 3.8 | ± | 2.0 | 0.8 | 42.1 | 70.0 |
| 104 | 2 | 2.4 | ± | 1.0 | 2.2 | ± | 0.9 | 1.1 | 26.7 | 23.3 |
| 105 | 2 | 3.3 | ± | 1.7 | 3.1 | ± | 1.5 | 1.1 | 46.7 | 50.0 |
| 106 | 2 | 2.3 | ± | 0.8 | 2.3 | ± | 0.8 | 1.0 | 20.0 | 20.0 |
| 107 | 2 | 1.9 | ± | 0.6 | 2.1 | ± | 0.7 | 0.9 | 10.0 | 10.0 |
| 108 | 2 | 2.2 | ± | 0.7 | 2.1 | ± | 0.7 | 1.0 | 16.7 | 13.3 |
| 109 | 2 | 4.9 | ± | 2.9 | 4.8 | ± | 2.7 | 1.0 | 73.3 | 73.3 |
| 110 | 2 | 2.9 | ± | 1.8 | 2.7 | ± | 1.6 | 1.1 | 26.7 | 23.3 |
| 111 | 2 | 2.0 | ± | 0.7 | 2.0 | ± | 0.6 | 1.0 | 10.0 | 5.0  |
| 112 | 2 | 2.4 | ± | 1.0 | 2.3 | ± | 1.0 | 1.0 | 23.3 | 23.3 |
| 113 | 2 | 2.8 | ± | 1.4 | 2.7 | ± | 1.3 | 1.1 | 36.7 | 36.7 |
| 114 | 2 | 2.2 | ± | 0.7 | 2.2 | ± | 0.7 | 1.0 | 15.0 | 10.0 |
| 115 | 2 | 2.2 | ± | 0.8 | 2.1 | ± | 0.7 | 1.0 | 16.7 | 13.3 |
| 116 | 2 | 2.1 | ± | 0.7 | 2.3 | ± | 0.7 | 0.9 | 20.0 | 23.3 |
| 117 | 2 | 2.7 | ± | 0.9 | 2.5 | ± | 1.1 | 1.1 | 45.0 | 40.0 |
| 118 | 2 | 2.8 | ± | 1.0 | 2.7 | ± | 1.0 | 1.0 | 43.3 | 43.3 |
| 119 | 2 | 3.5 | ± | 0.9 | ND  |   |     | ND  | 85.0 | ND   |
| 120 | 2 | 3.7 | ± | 1.3 | 3.6 | ± | 1.2 | 1.0 | 76.7 | 73.3 |
| 121 | 2 | 2.7 | ± | 1.1 | 2.4 | ± | 0.9 | 1.1 | 40.0 | 36.7 |
| 122 | 2 | 2.8 | ± | 0.9 | 2.7 | ± | 0.9 | 1.0 | 50.0 | 46.7 |
| 123 | 2 | 1.9 | ± | 0.5 | 2.1 | ± | 0.6 | 0.9 | 6.7  | 6.7  |
| 124 | 2 | 1.9 | ± | 0.7 | 2.2 | ± | 0.5 | 0.9 | 5.0  | 10.0 |
| 125 | 2 | 2.9 | ± | 1.3 | 4.1 | ± | 7.3 | 0.7 | 43.3 | 43.3 |
| 126 | 2 | 3.6 | ± | 2.3 | 4.0 | ± | 2.9 | 0.9 | 53.3 | 50.0 |
| 127 | 2 | 2.2 | ± | 0.7 | 2.1 | ± | 0.7 | 1.0 | 16.7 | 10.0 |
| 128 | 2 | 2.4 | ± | 0.9 | 2.4 | ± | 1.0 | 1.0 | 30.0 | 26.7 |
| 129 | 2 | 2.1 | ± | 0.9 | 2.3 | ± | 0.8 | 0.9 | 20.0 | 20.0 |
| 130 | 2 | 2.4 | ± | 1.1 | 2.3 | ± | 0.9 | 1.0 | 23.3 | 20.0 |
| 131 | 2 | 2.7 | ± | 1.3 | 2.8 | ± | 1.1 | 1.0 | 35.0 | 35.0 |
| 132 | 2 | 3.2 | ± | 1.2 | 3.3 | ± | 1.4 | 1.0 | 65.0 | 60.0 |
| 133 | 2 | 2.9 | ± | 0.9 | 3.1 | ± | 1.2 | 0.9 | 55.0 | 55.0 |
| 134 | 2 | 2.1 | ± | 0.6 | 2.1 | ± | 0.7 | 1.0 | 13.3 | 10.0 |
| 135 | 2 | 2.1 | ± | 0.7 | 2.8 | ± | 1.4 | 0.8 | 26.7 | 40.0 |
| 136 | 2 | 2.2 | ± | 0.9 | 2.4 | ± | 1.0 | 0.9 | 16.7 | 20.0 |
| 137 | 2 | 2.9 | ± | 1.3 | 2.9 | ± | 1.7 | 1.0 | 46.7 | 40.0 |
| 138 | 2 | 2.4 | ± | 0.8 | 2.3 | ± | 0.7 | 1.0 | 25.0 | 20.0 |
| 139 | 2 | 3.4 | ± | 2.1 | 2.8 | ± | 1.6 | 1.2 | 56.7 | 43.3 |
| 140 | 2 | 2.2 | ± | 0.7 | 2.3 | ± | 0.8 | 0.9 | 16.7 | 20.0 |
| 141 | 2 | 2.2 | ± | 0.8 | 2.2 | ± | 0.8 | 1.0 | 20.0 | 15.0 |
| 142 | 2 | 2.2 | ± | 0.7 | 2.2 | ± | 0.8 | 1.0 | 16.7 | 16.7 |
| 143 | 2 | 2.3 | ± | 0.9 | 2.4 | ± | 1.0 | 1.0 | 16.7 | 23.3 |
| 144 | 2 | 2.6 | ± | 1.4 | 2.8 | ± | 1.6 | 0.9 | 26.7 | 26.7 |

|     |   |     |   |     |     |   |     |     |      |      |
|-----|---|-----|---|-----|-----|---|-----|-----|------|------|
| 145 | 2 | 2.5 | ± | 0.8 | 2.7 | ± | 1.1 | 0.9 | 33.3 | 41.7 |
| 146 | 2 | 3.2 | ± | 2.2 | 3.1 | ± | 2.6 | 1.0 | 53.3 | 43.3 |
| 147 | 2 | 5.9 | ± | 4.5 | 5.9 | ± | 3.9 | 1.0 | 65.0 | 85.0 |
| 148 | 2 | 2.2 | ± | 0.9 | 2.1 | ± | 0.9 | 1.0 | 23.3 | 26.7 |
| 149 | 2 | 2.3 | ± | 0.8 | 2.1 | ± | 0.8 | 1.1 | 23.3 | 20.0 |
| 150 | 2 | 2.9 | ± | 1.3 | 2.7 | ± | 1.1 | 1.1 | 45.0 | 35.0 |
| 151 | 2 | 2.0 | ± | 0.7 | 2.1 | ± | 0.6 | 1.0 | 6.7  | 6.7  |
| 152 | 3 | 2.2 | ± | 0.8 | 2.2 | ± | 0.9 | 1.0 | 23.3 | 20.0 |
| 153 | 3 | 2.6 | ± | 0.9 | 2.5 | ± | 0.9 | 1.0 | 33.3 | 30.0 |
| 154 | 3 | 3.1 | ± | 1.3 | 3.0 | ± | 1.1 | 1.0 | 59.3 | 55.6 |
| 155 | 3 | 2.0 | ± | 0.8 | 2.1 | ± | 0.8 | 1.0 | 10.0 | 10.0 |
| 156 | 3 | 2.5 | ± | 1.2 | 2.5 | ± | 1.1 | 1.0 | 26.7 | 26.7 |
| 157 | 3 | 3.3 | ± | 1.6 | 2.8 | ± | 1.4 | 1.2 | 55.0 | 50.0 |
| 158 | 3 | 2.9 | ± | 1.3 | 2.7 | ± | 1.1 | 1.0 | 46.7 | 43.3 |
| 159 | 3 | 2.1 | ± | 0.5 | 2.2 | ± | 0.6 | 1.0 | 6.7  | 10.0 |
| 160 | 3 | 2.6 | ± | 1.0 | 2.5 | ± | 0.9 | 1.0 | 33.3 | 26.7 |
| 161 | 3 | 5.0 | ± | 1.5 | 4.9 | ± | 1.3 | 1.0 | 96.7 | 96.7 |
| 162 | 3 | 2.9 | ± | 1.0 | ND  |   |     | ND  | 52.5 | ND   |
| 163 | 3 | 1.9 | ± | 0.8 | ND  |   |     | ND  | 13.2 | ND   |
| 164 | 3 | 1.9 | ± | 0.6 | ND  |   |     | ND  | 6.1  | ND   |
| 165 | 3 | 2.0 | ± | 0.3 | 2.0 | ± | 0.5 | 1.0 | 3.3  | 3.3  |
| 166 | 3 | 3.4 | ± | 1.2 | 3.4 | ± | 1.1 | 1.0 | 66.7 | 66.7 |
| 167 | 3 | 2.2 | ± | 0.6 | 2.1 | ± | 0.7 | 1.0 | 13.3 | 13.3 |
| 168 | 3 | 3.1 | ± | 1.3 | 3.1 | ± | 1.2 | 1.0 | 56.7 | 50.0 |
| 169 | 3 | 2.3 | ± | 0.8 | 2.3 | ± | 0.7 | 1.0 | 20.0 | 23.3 |
| 170 | 3 | 3.7 | ± | 1.8 | 3.8 | ± | 1.9 | 1.0 | 60.0 | 60.0 |
| 171 | 3 | 2.8 | ± | 0.9 | 3.0 | ± | 1.0 | 0.9 | 50.0 | 60.0 |
| 172 | 3 | 3.0 | ± | 1.3 | 3.9 | ± | 1.6 | 0.8 | 53.3 | 80.0 |
| 173 | 3 | 4.2 | ± | 1.9 | 4.7 | ± | 2.4 | 0.9 | 80.0 | 90.0 |
| 174 | 3 | 2.7 | ± | 1.2 | 2.8 | ± | 1.0 | 1.0 | 46.7 | 53.3 |
| 175 | 3 | 2.5 | ± | 1.0 | 2.1 | ± | 0.5 | 1.2 | 40.0 | 20.0 |
| 176 | 3 | 2.1 | ± | 0.5 | 2.0 | ± | 0.5 | 1.0 | 13.3 | 13.3 |
| 177 | 3 | 3.8 | ± | 1.8 | 3.5 | ± | 1.7 | 1.1 | 65.0 | 65.0 |
| 178 | 3 | 2.8 | ± | 1.2 | 2.6 | ± | 1.2 | 1.1 | 50.0 | 35.0 |
| 179 | 3 | 2.5 | ± | 0.9 | 2.4 | ± | 1.0 | 1.0 | 47.1 | 32.4 |
| 180 | 3 | 2.5 | ± | 0.9 | 2.5 | ± | 0.9 | 1.0 | 33.3 | 33.3 |
| 181 | 3 | 3.4 | ± | 1.6 | 3.3 | ± | 1.3 | 1.0 | 58.1 | 58.1 |
| 182 | 3 | 3.3 | ± | 0.9 | 3.3 | ± | 0.9 | 1.0 | 76.7 | 70.0 |
| 183 | 3 | 3.9 | ± | 1.9 | 3.4 | ± | 1.6 | 1.1 | 70.0 | 66.7 |
| 184 | 3 | 2.3 | ± | 0.7 | 2.1 | ± | 0.6 | 1.1 | 20.0 | 15.0 |
| 185 | 3 | 3.2 | ± | 0.8 | 2.9 | ± | 0.8 | 1.1 | 73.3 | 63.3 |
| 186 | 3 | 2.9 | ± | 1.2 | 3.0 | ± | 1.2 | 1.0 | 53.3 | 56.7 |
| 187 | 3 | 2.2 | ± | 0.7 | 2.0 | ± | 0.8 | 1.1 | 16.7 | 10.0 |
| 188 | 3 | 2.8 | ± | 0.9 | 2.7 | ± | 1.0 | 1.0 | 60.0 | 60.0 |
| 189 | 3 | 2.0 | ± | 0.5 | 1.9 | ± | 0.5 | 1.0 | 3.3  | 3.3  |
| 190 | 3 | 3.4 | ± | 1.3 | 3.3 | ± | 1.2 | 1.0 | 63.3 | 63.3 |
| 191 | 3 | 2.6 | ± | 1.0 | 2.5 | ± | 1.0 | 1.1 | 40.0 | 35.0 |
| 192 | 3 | 2.9 | ± | 1.0 | 3.2 | ± | 1.0 | 0.9 | 50.0 | 70.0 |
| 193 | 3 | 2.1 | ± | 0.8 | 2.2 | ± | 0.8 | 1.0 | 20.0 | 20.0 |
| 194 | 3 | 2.6 | ± | 1.1 | 2.7 | ± | 1.4 | 1.0 | 30.0 | 36.7 |

|     |   |     |   |     |     |   |     |     |      |      |
|-----|---|-----|---|-----|-----|---|-----|-----|------|------|
| 195 | 3 | 3.0 | ± | 1.3 | 2.9 | ± | 1.1 | 1.0 | 56.7 | 53.3 |
| 196 | 3 | 2.8 | ± | 1.0 | 3.4 | ± | 1.2 | 0.8 | 53.8 | 69.2 |
| 197 | 3 | 3.4 | ± | 1.8 | 3.0 | ± | 1.0 | 1.2 | 53.3 | 53.3 |
| 198 | 3 | 4.1 | ± | 2.2 | 3.9 | ± | 1.8 | 1.0 | 73.3 | 70.0 |
| 199 | 3 | 4.1 | ± | 2.3 | 3.8 | ± | 1.9 | 1.1 | 70.0 | 70.0 |
| 200 | 3 | 3.8 | ± | 1.0 | 3.6 | ± | 0.9 | 1.1 | 85.0 | 85.0 |
| 201 | 3 | 4.6 | ± | 2.6 | 4.1 | ± | 1.9 | 1.1 | 70.0 | 73.3 |
| 202 | 3 | 3.5 | ± | 1.5 | 3.5 | ± | 1.3 | 1.0 | 73.3 | 73.3 |
| 203 | 3 | 3.3 | ± | 1.6 | 3.4 | ± | 1.7 | 1.0 | 60.0 | 60.0 |
| 204 | 3 | 2.7 | ± | 1.5 | 2.8 | ± | 1.4 | 1.0 | 36.7 | 33.3 |
| 205 | 3 | 2.6 | ± | 0.9 | 2.6 | ± | 0.8 | 1.0 | 45.7 | 42.9 |
| 206 | 3 | 2.5 | ± | 1.2 | 2.5 | ± | 1.1 | 1.0 | 33.3 | 26.7 |
| 207 | 3 | 3.2 | ± | 1.3 | 2.9 | ± | 1.2 | 1.1 | 50.0 | 43.3 |
| 208 | 3 | 2.0 | ± | 0.7 | 2.1 | ± | 0.6 | 1.0 | 10.0 | 10.0 |
| 209 | 3 | 2.2 | ± | 0.8 | 2.1 | ± | 0.7 | 1.0 | 13.3 | 16.7 |
| 210 | 3 | 2.3 | ± | 0.7 | 2.2 | ± | 0.8 | 1.0 | 25.0 | 20.0 |
| 211 | 3 | 2.1 | ± | 0.6 | 2.1 | ± | 0.7 | 1.0 | 13.3 | 13.3 |
| 212 | 3 | 2.6 | ± | 1.0 | 2.5 | ± | 1.0 | 1.1 | 30.0 | 25.0 |
| 213 | 3 | 2.7 | ± | 0.9 | 2.7 | ± | 1.1 | 1.0 | 40.0 | 40.0 |
| 214 | 3 | 2.7 | ± | 1.0 | 2.9 | ± | 1.2 | 0.9 | 50.0 | 46.7 |
| 215 | 3 | 3.2 | ± | 1.4 | 2.9 | ± | 1.7 | 1.1 | 56.7 | 50.0 |
| 216 | 3 | 3.6 | ± | 1.2 | 3.2 | ± | 1.4 | 1.1 | 70.0 | 53.3 |
| 217 | 3 | 3.0 | ± | 1.2 | 2.9 | ± | 1.2 | 1.0 | 46.7 | 50.0 |
| 218 | 3 | 2.3 | ± | 0.9 | 2.5 | ± | 0.8 | 0.9 | 25.0 | 25.0 |
| 219 | 3 | 3.0 | ± | 1.0 | 2.8 | ± | 1.0 | 1.1 | 60.0 | 45.0 |
| 220 | 3 | 2.8 | ± | 1.0 | 2.8 | ± | 1.0 | 1.0 | 43.3 | 43.3 |
| 221 | 3 | 2.6 | ± | 0.9 | 2.5 | ± | 1.0 | 1.0 | 36.7 | 36.7 |
| 222 | 3 | 2.5 | ± | 0.9 | 2.5 | ± | 1.0 | 1.0 | 43.3 | 46.7 |
| 223 | 3 | 2.6 | ± | 0.9 | 2.5 | ± | 1.0 | 1.1 | 40.0 | 30.0 |
| 224 | 3 | 2.3 | ± | 0.6 | 2.3 | ± | 0.9 | 1.0 | 26.7 | 30.0 |
| 225 | 3 | 3.2 | ± | 1.1 | 3.2 | ± | 1.0 | 1.0 | 66.7 | 63.3 |
| 226 | 3 | 2.8 | ± | 1.1 | 2.9 | ± | 1.1 | 1.0 | 45.0 | 50.0 |
| 227 | 3 | 2.7 | ± | 1.5 | 2.5 | ± | 1.2 | 1.1 | 30.0 | 33.3 |
| 228 | 3 | 2.3 | ± | 1.0 | 2.2 | ± | 0.7 | 1.0 | 20.0 | 13.3 |
| 229 | 3 | 3.0 | ± | 1.3 | 3.3 | ± | 1.5 | 0.9 | 46.7 | 56.7 |
| 230 | 3 | 3.4 | ± | 1.6 | 3.4 | ± | 1.7 | 1.0 | 60.0 | 53.3 |
| 231 | 3 | 3.1 | ± | 1.6 | 3.2 | ± | 1.3 | 1.0 | 50.0 | 50.0 |
| 232 | 3 | 3.8 | ± | 1.1 | 3.6 | ± | 1.2 | 1.1 | 86.7 | 73.3 |
| 233 | 3 | 3.1 | ± | 1.4 | 3.0 | ± | 1.3 | 1.0 | 53.3 | 46.7 |
| 234 | 3 | 3.2 | ± | 1.9 | 2.8 | ± | 1.6 | 1.1 | 50.0 | 26.7 |
| 235 | 3 | 3.3 | ± | 2.8 | 3.1 | ± | 3.3 | 1.1 | 33.3 | 26.7 |
| 236 | 3 | 2.7 | ± | 1.3 | 2.8 | ± | 1.3 | 1.0 | 45.0 | 45.0 |
| 237 | 3 | 2.0 | ± | 0.9 | 2.7 | ± | 1.1 | 0.7 | 26.7 | 43.3 |
| 238 | 3 | 2.5 | ± | 1.2 | 2.5 | ± | 1.2 | 1.0 | 30.0 | 20.0 |
